# Supplementary material
Source: Springer Nature journal article supplement (https://www.springermedizin.de/resource/supplementary/12936_2007_422_MOESM2_ESM.pdf/9547418)

2A.

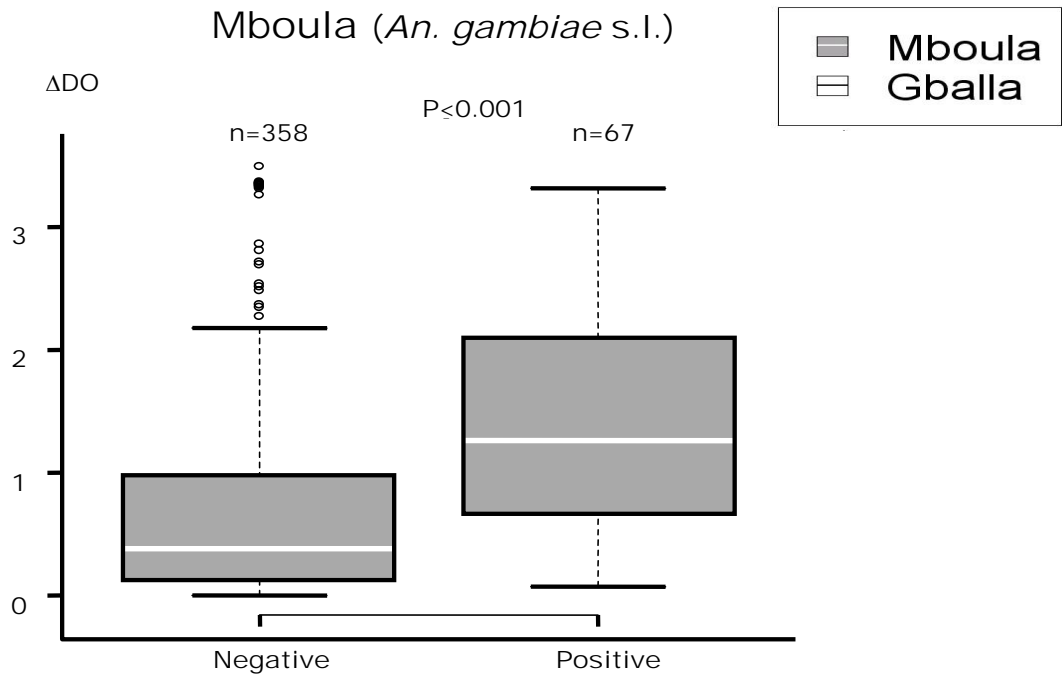

2B.

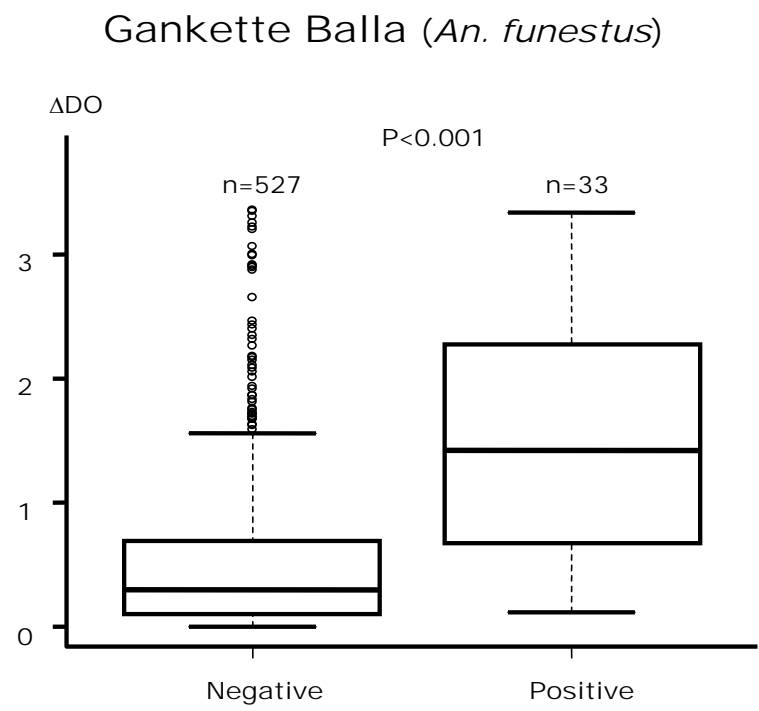

Supplement: MOESM2 [file 9547418]
